# Supplementary material for: Efficiency of Virucidal Disinfectants on Wood Surfaces in Animal Husbandry
Source: MDPI journal article supplement (doi:10.3390/microorganisms12051019), 2024-05-17
Supplement: s1 [file s1]

**Table S1.** EV-E on spruce wood with peracetic acid at 10 °C and 60 min exposure time.

| Experiment | Concentration in %<br>(v/v) | Titre in<br>$\log_{10}\text{TCID}_{50}/\text{mL}$ | Reduction in<br>$\log_{10}\text{TCID}_{50}/\text{mL}$ |
|------------|-----------------------------|---------------------------------------------------|-------------------------------------------------------|
| 1          | Hard water                  | 7.00                                              |                                                       |
|            | 0.01                        | 4.67                                              | 2.33                                                  |
|            | 0.025                       | 3.83                                              | 3.17                                                  |
|            | 0.05                        | $\leq 3.83$                                       | $\geq 3.17$                                           |
|            | 0.075                       | $\leq 2.50$                                       | $\geq 4.50$                                           |
|            | 0.1                         | $\leq 2.50$                                       | $\geq 4.50$                                           |
| 2          | Hard water                  | 7.00                                              |                                                       |
|            | 0.01                        | 5.00                                              | 2.00                                                  |
|            | 0.025                       | 4.33                                              | 2.67                                                  |
|            | 0.05                        | $\leq 3.50$                                       | $\geq 3.50$                                           |
|            | 0.075                       | $\leq 2.50$                                       | $\geq 4.50$                                           |
|            | 0.1                         | $\leq 2.50$                                       | $\geq 4.50$                                           |
| 3          | Hard water                  | 7.33                                              |                                                       |
|            | 0.01                        | 5.67                                              | 1.67                                                  |
|            | 0.025                       | 5.17                                              | 2.17                                                  |
|            | 0.05                        | 5.00                                              | 2.33                                                  |
|            | 0.075                       | $\leq 2.67$                                       | $\geq 4.67$                                           |
|            | 0.1                         | $\leq 2.50$                                       | $\geq 4.83$                                           |

**Table S2.** EV-E on pine wood with peracetic acid at 10 °C and 60 min exposure time.

| Experiment | Concentration in %<br>(v/v) | Titre in<br>$\log_{10}\text{TCID}_{50}/\text{mL}$ | Reduction in<br>$\log_{10}\text{TCID}_{50}/\text{mL}$ |
|------------|-----------------------------|---------------------------------------------------|-------------------------------------------------------|
| 1          | Hard water                  | 7.17                                              |                                                       |
|            | 0.0075                      | 5.33                                              | 1.83                                                  |
|            | 0.01                        | 5.67                                              | 1.50                                                  |
|            | 0.025                       | 4.17                                              | 3.00                                                  |
|            | 0.05                        | $\leq 2.50$                                       | $\geq 4.67$                                           |
|            | 0.075                       | $\leq 2.50$                                       | $\geq 4.67$                                           |
| 2          | Hard water                  | 7.33                                              |                                                       |
|            | 0.0075                      | 5.33                                              | 2.00                                                  |
|            | 0.01                        | 3.67                                              | 3.67                                                  |
|            | 0.025                       | $\leq 3.17$                                       | $\geq 4.17$                                           |
|            | 0.05                        | $\leq 2.50$                                       | $\geq 4.83$                                           |
|            | 0.075                       | $\leq 2.50$                                       | $\geq 4.83$                                           |
| 3          | Hard water                  | 7.00                                              |                                                       |
|            | 0.0075                      | 5.33                                              | 1.67                                                  |
|            | 0.01                        | 4.83                                              | 2.17                                                  |
|            | 0.025                       | 3.50                                              | 3.50                                                  |
|            | 0.05                        | $\leq 3.00$                                       | $\geq 4.00$                                           |
|            | 0.075                       | $\leq 2.67$                                       | $\geq 4.33$                                           |

**Table S3.** EV-E on poplar wood with peracetic acid at 10 °C and 60 min exposure time.

| Experiment | Concentration in %<br>(v/v) | Titre in<br>$\log_{10}\text{TCID}_{50}/\text{mL}$ | Reduction in<br>$\log_{10}\text{TCID}_{50}/\text{mL}$ |
|------------|-----------------------------|---------------------------------------------------|-------------------------------------------------------|
| 1          | Hard water                  | 6.83                                              |                                                       |
|            | 0.01                        | 5.50                                              | 1.33                                                  |
|            | 0.025                       | $\leq 3.00$                                       | $\geq 3.83$                                           |
|            | 0.05                        | $\leq 2.50$                                       | $\geq 4.33$                                           |
|            | 0.075                       | $\leq 2.50$                                       | $\geq 4.33$                                           |
|            | 0.1                         | $\leq 2.50$                                       | $\geq 4.33$                                           |
| 2          | Hard water                  | 6.83                                              |                                                       |
|            | 0.01                        | 4.33                                              | 2.50                                                  |
|            | 0.025                       | 4.00                                              | 2.83                                                  |
|            | 0.05                        | $\leq 2.50$                                       | $\geq 4.33$                                           |
|            | 0.075                       | $\leq 2.50$                                       | $\geq 4.33$                                           |
|            | 0.1                         | $\leq 2.50$                                       | $\geq 4.33$                                           |
| 3          | Hard water                  | 7.00                                              |                                                       |
|            | 0.01                        | 5.67                                              | 1.33                                                  |
|            | 0.025                       | $\leq 3.50$                                       | $\geq 3.50$                                           |
|            | 0.05                        | $\leq 2.50$                                       | $\geq 4.50$                                           |
|            | 0.075                       | $\leq 2.50$                                       | $\geq 4.50$                                           |
|            | 0.1                         | $\leq 2.50$                                       | $\geq 4.50$                                           |

**Table S4.** EV-E on beech wood with peracetic acid at 10 °C and 60 min exposure time.

| Experiment | Concentration in %<br>(v/v) | Titre in<br>$\log_{10}\text{TCID}_{50}/\text{mL}$ | Reduction in<br>$\log_{10}\text{TCID}_{50}/\text{mL}$ |
|------------|-----------------------------|---------------------------------------------------|-------------------------------------------------------|
| 1          | Hard water                  | 7.50                                              |                                                       |
|            | 0.01                        | 5.33                                              | 2.17                                                  |
|            | 0.025                       | 4.33                                              | 3.17                                                  |
|            | 0.05                        | 4.67                                              | 2.83                                                  |
|            | 0.075                       | $\leq 2.50$                                       | $\geq 5.00$                                           |
|            | 0.1                         | $\leq 2.50$                                       | $\geq 5.00$                                           |
| 2          | Hard water                  | 7.67                                              |                                                       |
|            | 0.01                        | 5.67                                              | 2.00                                                  |
|            | 0.025                       | 4.50                                              | 3.17                                                  |
|            | 0.05                        | $\leq 3.17$                                       | $\geq 4.50$                                           |
|            | 0.075                       | $\leq 2.67$                                       | $\geq 5.00$                                           |
|            | 0.1                         | $\leq 2.50$                                       | $\geq 5.17$                                           |
| 3          | Hard water                  | 7.33                                              |                                                       |
|            | 0.01                        | 5.67                                              | 1.67                                                  |
|            | 0.025                       | $\leq 3.67$                                       | $\geq 3.67$                                           |
|            | 0.05                        | $\leq 3.67$                                       | $\geq 3.67$                                           |
|            | 0.075                       | $\leq 2.50$                                       | $\geq 4.83$                                           |
|            | 0.1                         | $\leq 2.50$                                       | $\geq 4.83$                                           |

**Table S5.** EV-E on Douglas fir wood with peracetic acid at 10 °C and 60 min exposure time.

| Experiment | Concentration in %<br>(v/v) | Titre in<br>$\log_{10}\text{TCID}_{50}/\text{mL}$ | Reduction in<br>$\log_{10}\text{TCID}_{50}/\text{mL}$ |
|------------|-----------------------------|---------------------------------------------------|-------------------------------------------------------|
| 1          | Hard water                  | 7.50                                              |                                                       |
|            | 0.01                        | 6.00                                              | 1.50                                                  |
|            | 0.025                       | 5.17                                              | 2.33                                                  |
|            | 0.05                        | $\leq 3.17$                                       | $\geq 4.33$                                           |
|            | 0.075                       | $\leq 2.83$                                       | $\geq 4.67$                                           |
|            | 0.1                         | $\leq 2.50$                                       | $\geq 5.00$                                           |
| 2          | Hard water                  | 6.83                                              |                                                       |
|            | 0.01                        | 6.00                                              | 0.83                                                  |
|            | 0.025                       | $\leq 3.33$                                       | $\geq 3.50$                                           |
|            | 0.05                        | 4.00                                              | 2.83                                                  |
|            | 0.075                       | $\leq 3.33$                                       | $\geq 3.50$                                           |
|            | 0.1                         | $\leq 2.50$                                       | $\geq 4.33$                                           |
| 3          | Hard water                  | 7.67                                              |                                                       |
|            | 0.01                        | 6.17                                              | 1.50                                                  |
|            | 0.025                       | 5.33                                              | 2.33                                                  |
|            | 0.05                        | $\leq 2.83$                                       | $\geq 4.83$                                           |
|            | 0.075                       | $\leq 3.33$                                       | $\geq 4.33$                                           |
|            | 0.1                         | $\leq 2.83$                                       | $\geq 4.83$                                           |

**Table S6.** NDV on spruce wood with peracetic acid at 10 °C and 60 min exposure time.

| Experiment | Concentration in %<br>(v/v) | Titre in<br>$\log_{10}\text{TCID}_{50}/\text{mL}$ | Reduction in<br>$\log_{10}\text{TCID}_{50}/\text{mL}$ |
|------------|-----------------------------|---------------------------------------------------|-------------------------------------------------------|
| 1          | Hard water                  | 7.67                                              |                                                       |
|            | 0.0025                      | 4.83                                              | 2.83                                                  |
|            | 0.005                       | 4.50                                              | 3.17                                                  |
|            | 0.0075                      | 4.67                                              | 3.00                                                  |
|            | 0.01                        | $\leq 2.50$                                       | $\geq 5.17$                                           |
|            | 0.025                       | $\leq 2.50$                                       | $\geq 5.17$                                           |
| 2          | Hard water                  | 7.17                                              |                                                       |
|            | 0.0025                      | 5.00                                              | 2.17                                                  |
|            | 0.005                       | 3.67                                              | 3.50                                                  |
|            | 0.0075                      | 3.67                                              | 3.50                                                  |
|            | 0.01                        | $\leq 2.67$                                       | $\geq 4.50$                                           |
|            | 0.025                       | $\leq 2.67$                                       | $\geq 4.50$                                           |
| 3          | Hard water                  | 6.50                                              |                                                       |
|            | 0.0025                      | 4.33                                              | 2.17                                                  |
|            | 0.005                       | $\leq 3.50$                                       | $\geq 3.00$                                           |
|            | 0.0075                      | $\leq 2.50$                                       | $\geq 4.00$                                           |
|            | 0.01                        | $\leq 2.50$                                       | $\geq 4.00$                                           |
|            | 0.025                       | $\leq 2.50$                                       | $\geq 4.00$                                           |

**Table S7.** NDV on pine wood with peracetic acid at 10 °C and 60 min exposure time.

| Experiment | Concentration in %<br>(v/v) | Titre in<br>$\log_{10}\text{TCID}_{50}/\text{mL}$ | Reduction in<br>$\log_{10}\text{TCID}_{50}/\text{mL}$ |
|------------|-----------------------------|---------------------------------------------------|-------------------------------------------------------|
| 1          | Hard water                  | 6.00                                              |                                                       |
|            | 0.00025                     | 3.67                                              | 2.33                                                  |
|            | 0.0005                      | 3.83                                              | 2.17                                                  |
|            | 0.00075                     | 2.50                                              | 3.50                                                  |
|            | 0.001                       | $\leq 1.67$                                       | $\geq 4.33$                                           |
|            | 0.0025                      | $\leq 1.50$                                       | $\geq 4.50$                                           |
| 2          | Hard water                  | 5.83                                              |                                                       |
|            | 0.00025                     | 3.83                                              | 2.00                                                  |
|            | 0.0005                      | 3.17                                              | 2.67                                                  |
|            | 0.00075                     | 2.83                                              | 3.00                                                  |
|            | 0.001                       | $\leq 2.33$                                       | $\geq 3.50$                                           |
|            | 0.0025                      | $\leq 1.50$                                       | $\geq 4.33$                                           |
| 3          | Hard water                  | 5.83                                              |                                                       |
|            | 0.00025                     | 3.50                                              | 2.33                                                  |
|            | 0.0005                      | 3.67                                              | 2.17                                                  |
|            | 0.00075                     | 3.00                                              | 2.83                                                  |
|            | 0.001                       | $\leq 1.50$                                       | $\geq 4.33$                                           |
|            | 0.0025                      | $\leq 1.50$                                       | $\geq 4.33$                                           |

**Table S8.** NDV on poplar wood with peracetic acid at 10 °C and 60 min exposure time.

| Experiment | Concentration in %<br>(v/v) | Titre in<br>$\log_{10}\text{TCID}_{50}/\text{mL}$ | Reduction in<br>$\log_{10}\text{TCID}_{50}/\text{mL}$ |
|------------|-----------------------------|---------------------------------------------------|-------------------------------------------------------|
| 1          | Hard water                  | 7.33                                              |                                                       |
|            | 0.0025                      | 5.33                                              | 2.00                                                  |
|            | 0.005                       | 4.67                                              | 2.67                                                  |
|            | 0.0075                      | 4.17                                              | 3.17                                                  |
|            | 0.01                        | $\leq 4.00$                                       | $\geq 3.33$                                           |
|            | 0.025                       | $\leq 2.50$                                       | $\geq 4.83$                                           |
| 2          | Hard water                  | 6.50                                              |                                                       |
|            | 0.0025                      | 4.33                                              | 2.17                                                  |
|            | 0.005                       | 4.00                                              | 2.50                                                  |
|            | 0.0075                      | 3.83                                              | 2.67                                                  |
|            | 0.01                        | $\leq 2.67$                                       | $\geq 3.83$                                           |
|            | 0.025                       | $\leq 2.50$                                       | $\geq 4.00$                                           |
| 3          | Hard water                  | 6.50                                              |                                                       |
|            | 0.0025                      | $\leq 3.67$                                       | $\geq 2.83$                                           |
|            | 0.005                       | $\leq 3.50$                                       | $\geq 3.00$                                           |
|            | 0.0075                      | 3.67                                              | 2.83                                                  |
|            | 0.01                        | $\leq 2.83$                                       | $\geq 3.67$                                           |
|            | 0.025                       | $\leq 2.50$                                       | $\geq 4.00$                                           |

**Table S9.** NDV on beech wood with peracetic acid at 10 °C and 60 min exposure time.

| Experiment | Concentration in %<br>(v/v) | Titre in<br>$\log_{10}\text{TCID}_{50}/\text{mL}$ | Reduction in<br>$\log_{10}\text{TCID}_{50}/\text{mL}$ |
|------------|-----------------------------|---------------------------------------------------|-------------------------------------------------------|
| 1          | Hard water                  | 7.17                                              |                                                       |
|            | 0.0025                      | 4.83                                              | 2.33                                                  |
|            | 0.005                       | 4.83                                              | 2.33                                                  |
|            | 0.0075                      | 5.67                                              | 1.50                                                  |
|            | 0.01                        | 3.50                                              | 3.67                                                  |
|            | 0.025                       | $\leq 2.50$                                       | $\geq 4.67$                                           |
| 2          | Hard water                  | 7.83                                              |                                                       |
|            | 0.0025                      | 5.50                                              | 2.33                                                  |
|            | 0.005                       | 5.33                                              | 2.50                                                  |
|            | 0.0075                      | 4.00                                              | 3.83                                                  |
|            | 0.01                        | 4.83                                              | 3.00                                                  |
|            | 0.025                       | $\leq 2.50$                                       | $\geq 5.33$                                           |
| 3          | Hard water                  | 7.17                                              |                                                       |
|            | 0.0025                      | 5.50                                              | 1.67                                                  |
|            | 0.005                       | 4.00                                              | 3.17                                                  |
|            | 0.0075                      | 3.83                                              | 3.33                                                  |
|            | 0.01                        | $\leq 2.67$                                       | $\geq 4.50$                                           |
|            | 0.025                       | $\leq 2.50$                                       | $\geq 4.67$                                           |

**Table S10.** NDV on Douglas fir wood with peracetic acid at 10 °C and 60 min exposure time.

| Experiment | Concentration in %<br>(v/v) | Titre in<br>$\log_{10}\text{TCID}_{50}/\text{mL}$ | Reduction in<br>$\log_{10}\text{TCID}_{50}/\text{mL}$ |
|------------|-----------------------------|---------------------------------------------------|-------------------------------------------------------|
| 1          | Hard water                  | 7.33                                              |                                                       |
|            | 0.0075                      | 4.33                                              | 3.00                                                  |
|            | 0.01                        | $\leq 3.50$                                       | $\geq 3.83$                                           |
|            | 0.025                       | $\leq 2.67$                                       | $\geq 4.67$                                           |
|            | 0.05                        | $\leq 3.17$                                       | $\geq 4.17$                                           |
|            | 0.075                       | $\leq 2.50$                                       | $\geq 4.83$                                           |
| 2          | Hard water                  | 7.33                                              |                                                       |
|            | 0.0075                      | 3.50                                              | 3.83                                                  |
|            | 0.01                        | $\leq 2.50$                                       | $\geq 4.83$                                           |
|            | 0.025                       | $\leq 2.50$                                       | $\geq 4.83$                                           |
|            | 0.05                        | $\leq 2.50$                                       | $\geq 4.83$                                           |
|            | 0.075                       | $\leq 2.50$                                       | $\geq 4.83$                                           |
| 3          | Hard water                  | 7.17                                              |                                                       |
|            | 0.005                       | 4.83                                              | 2.33                                                  |
|            | 0.0075                      | $\leq 2.50$                                       | $\geq 4.67$                                           |
|            | 0.01                        | $\leq 2.50$                                       | $\geq 4.67$                                           |
|            | 0.025                       | $\leq 2.50$                                       | $\geq 4.67$                                           |
|            | 0.05                        | $\leq 2.50$                                       | $\geq 4.67$                                           |

**Table S11.** EV-E on spruce wood with formic acid at 10 °C and 60 min exposure time.

| Experiment | Concentration in %<br>(v/v) | Titre in<br>$\log_{10}\text{TCID}_{50}/\text{mL}$ | Reduction in<br>$\log_{10}\text{TCID}_{50}/\text{mL}$ |
|------------|-----------------------------|---------------------------------------------------|-------------------------------------------------------|
| 1          | Hard water                  | 7.00                                              |                                                       |
|            | 0.25                        | 6.83                                              | 0.17                                                  |
|            | 0.5                         | 6.00                                              | 1.00                                                  |
|            | 0.75                        | 3.83                                              | 3.17                                                  |
|            | 1                           | $\leq 3.50$                                       | $\geq 3.50$                                           |
|            | 1.5                         | $\leq 2.50$                                       | $\geq 4.50$                                           |
| 2          | Hard water                  | 7.50                                              |                                                       |
|            | 0.25                        | 7.33                                              | 0.17                                                  |
|            | 0.5                         | 6.50                                              | 1.00                                                  |
|            | 0.75                        | 4.67                                              | 2.83                                                  |
|            | 1                           | 5.50                                              | 2.00                                                  |
|            | 1.5                         | $\leq 3.17$                                       | $\geq 4.33$                                           |
| 3          | Hard water                  | 8.17                                              |                                                       |
|            | 0.25                        | 7.17                                              | 1.00                                                  |
|            | 0.5                         | 7.33                                              | 0.83                                                  |
|            | 0.75                        | 5.17                                              | 3.00                                                  |
|            | 1                           | 3.67                                              | 4.50                                                  |
|            | 1.5                         | $\leq 2.50$                                       | $\geq 5.67$                                           |

**Table S12.** EV-E on pine wood with formic acid at 10 °C and 60 min exposure time.

| Experiment | Concentration in %<br>(v/v) | Titre in<br>$\log_{10}\text{TCID}_{50}/\text{mL}$ | Reduction in<br>$\log_{10}\text{TCID}_{50}/\text{mL}$ |
|------------|-----------------------------|---------------------------------------------------|-------------------------------------------------------|
| 1          | Hard water                  | 7.67                                              |                                                       |
|            | 0.25                        | 6.50                                              | 1.17                                                  |
|            | 0.5                         | 5.50                                              | 2.17                                                  |
|            | 0.75                        | 5.83                                              | 1.83                                                  |
|            | 1                           | $\leq 3.33$                                       | $\geq 4.33$                                           |
|            | 1.5                         | $\leq 2.50$                                       | $\geq 5.17$                                           |
| 2          | Hard water                  | 7.50                                              |                                                       |
|            | 0.25                        | 7.17                                              | 0.33                                                  |
|            | 0.5                         | 5.50                                              | 2.00                                                  |
|            | 0.75                        | 4.83                                              | 2.67                                                  |
|            | 1                           | $\leq 2.67$                                       | $\geq 4.83$                                           |
|            | 1.5                         | $\leq 2.50$                                       | $\geq 5.00$                                           |
| 3          | Hard water                  | 7.67                                              |                                                       |
|            | 0.25                        | 7.50                                              | 0.17                                                  |
|            | 0.5                         | 5.50                                              | 2.17                                                  |
|            | 0.75                        | $\leq 2.83$                                       | $\geq 4.83$                                           |
|            | 1                           | $\leq 2.83$                                       | $\geq 4.83$                                           |
|            | 1.5                         | $\leq 2.50$                                       | $\geq 5.17$                                           |

**Table S13.** EV-E on poplar wood with formic acid at 10 °C and 60 min exposure time.

| Experiment | Concentration in %<br>(v/v) | Titre in<br>$\log_{10}\text{TCID}_{50}/\text{mL}$ | Reduction in<br>$\log_{10}\text{TCID}_{50}/\text{mL}$ |
|------------|-----------------------------|---------------------------------------------------|-------------------------------------------------------|
| 1          | Hard water                  | 6.83                                              |                                                       |
|            | 0.25                        | 6.67                                              | 0.17                                                  |
|            | 0.5                         | 5.50                                              | 1.33                                                  |
|            | 0.75                        | 4.17                                              | 2.67                                                  |
|            | 1                           | $\leq 3.00$                                       | $\geq 3.83$                                           |
|            | 1.5                         | $\leq 2.50$                                       | $\geq 4.33$                                           |
| 2          | Hard water                  | 7.50                                              |                                                       |
|            | 0.25                        | 7.00                                              | 0.50                                                  |
|            | 0.5                         | 5.67                                              | 1.83                                                  |
|            | 0.75                        | 4.50                                              | 3.00                                                  |
|            | 1                           | $\leq 2.50$                                       | $\geq 5.00$                                           |
|            | 1.5                         | $\leq 2.67$                                       | $\geq 4.83$                                           |
| 3          | Hard water                  | 7.17                                              |                                                       |
|            | 0.25                        | 7.00                                              | 0.17                                                  |
|            | 0.5                         | 5.17                                              | 2.00                                                  |
|            | 0.75                        | 4.17                                              | 3.00                                                  |
|            | 1                           | $\leq 2.50$                                       | $\geq 4.67$                                           |
|            | 1.5                         | $\leq 2.50$                                       | $\geq 4.67$                                           |

**Table S14.** EV-E on beech wood with formic acid at 10 °C and 60 min exposure time.

| Experiment | Concentration in %<br>(v/v) | Titre in<br>$\log_{10}\text{TCID}_{50}/\text{mL}$ | Reduction in<br>$\log_{10}\text{TCID}_{50}/\text{mL}$ |
|------------|-----------------------------|---------------------------------------------------|-------------------------------------------------------|
| 1          | Hard water                  | 7.83                                              |                                                       |
|            | 0.25                        | 7.17                                              | 0.67                                                  |
|            | 0.5                         | 6.00                                              | 1.83                                                  |
|            | 0.75                        | 5.17                                              | 2.67                                                  |
|            | 1                           | $\leq 3.00$                                       | $\geq 4.83$                                           |
|            | 1.5                         | $\leq 2.50$                                       | $\geq 5.33$                                           |
| 2          | Hard water                  | 8.00                                              |                                                       |
|            | 0.25                        | 7.33                                              | 0.67                                                  |
|            | 0.5                         | 6.17                                              | 1.83                                                  |
|            | 0.75                        | 4.50                                              | 3.50                                                  |
|            | 1                           | $\leq 2.83$                                       | $\geq 5.17$                                           |
|            | 1.5                         | $\leq 2.50$                                       | $\geq 5.50$                                           |
| 3          | Hard water                  | 7.83                                              |                                                       |
|            | 0.25                        | 7.00                                              | 0.83                                                  |
|            | 0.5                         | 6.17                                              | 1.67                                                  |
|            | 0.75                        | 3.83                                              | 4.00                                                  |
|            | 1                           | $\leq 3.17$                                       | $\geq 4.67$                                           |
|            | 1.5                         | $\leq 2.83$                                       | $\geq 5.00$                                           |

**Table S15.** EV-E on Douglas fir wood with formic acid at 10 °C and 60 min exposure time.

| Experiment | Concentration in %<br>(v/v) | Titre in<br>$\log_{10}\text{TCID}_{50}/\text{mL}$ | Reduction in<br>$\log_{10}\text{TCID}_{50}/\text{mL}$ |
|------------|-----------------------------|---------------------------------------------------|-------------------------------------------------------|
| 1          | Hard water                  | 7.67                                              |                                                       |
|            | 0.25                        | 7.17                                              | 0.50                                                  |
|            | 0.5                         | 4.17                                              | 3.50                                                  |
|            | 0.75                        | $\leq 2.50$                                       | $\geq 5.17$                                           |
|            | 1                           | $\leq 2.50$                                       | $\geq 5.17$                                           |
|            | 1.5                         | $\leq 2.50$                                       | $\geq 5.17$                                           |
| 2          | Hard water                  | 7.67                                              |                                                       |
|            | 0.25                        | 6.67                                              | 1.00                                                  |
|            | 0.5                         | 4.50                                              | 3.17                                                  |
|            | 0.75                        | 3.67                                              | 4.00                                                  |
|            | 1                           | $\leq 2.50$                                       | $\geq 5.17$                                           |
|            | 1.5                         | $\leq 2.50$                                       | $\geq 5.17$                                           |
| 3          | Hard water                  | 7.83                                              |                                                       |
|            | 0.25                        | 6.50                                              | 1.33                                                  |
|            | 0.5                         | 4.17                                              | 3.67                                                  |
|            | 0.75                        | $\leq 2.67$                                       | $\geq 5.17$                                           |
|            | 1                           | $\leq 2.67$                                       | $\geq 5.17$                                           |
|            | 1.5                         | $\leq 2.50$                                       | $\geq 5.33$                                           |

**Table S16.** NDV on spruce wood with formic acid at 10 °C and 60 min exposure time.

| Experiment | Concentration in %<br>(v/v) | Titre in<br>$\log_{10}\text{TCID}_{50}/\text{mL}$ | Reduction in<br>$\log_{10}\text{TCID}_{50}/\text{mL}$ |
|------------|-----------------------------|---------------------------------------------------|-------------------------------------------------------|
| 1          | Hard water                  | 6.50                                              |                                                       |
|            | 0.25                        | $\leq 3.00$                                       | $\geq 3.50$                                           |
|            | 0.5                         | $\leq 2.50$                                       | $\geq 4.00$                                           |
|            | 0.75                        | $\leq 2.50$                                       | $\geq 4.00$                                           |
|            | 1                           | $\leq 2.50$                                       | $\geq 4.00$                                           |
|            | 1.5                         | $\leq 2.50$                                       | $\geq 4.00$                                           |
| 2          | Hard water                  | 6.67                                              |                                                       |
|            | 0.075                       | 4.83                                              | 1.83                                                  |
|            | 0.1                         | 4.00                                              | 2.67                                                  |
|            | 0.25                        | $\leq 2.50$                                       | $\geq 4.17$                                           |
|            | 0.5                         | $\leq 2.50$                                       | $\geq 4.17$                                           |
|            | 0.75                        | $\leq 2.50$                                       | $\geq 4.17$                                           |
| 3          | Hard water                  | 6.67                                              |                                                       |
|            | 0.075                       | 5.17                                              | 1.50                                                  |
|            | 0.1                         | 4.83                                              | 1.83                                                  |
|            | 0.25                        | $\leq 3.17$                                       | $\geq 3.50$                                           |
|            | 0.5                         | $\leq 2.50$                                       | $\geq 4.17$                                           |
|            | 0.75                        | $\leq 2.50$                                       | $\geq 4.17$                                           |



**Table S17.** NDV on pine wood with formic acid at 10 °C and 60 min exposure time.

| Experiment | Concentration in %<br>(v/v) | Titre in<br>$\log_{10}\text{TCID}_{50}/\text{mL}$ | Reduction in<br>$\log_{10}\text{TCID}_{50}/\text{mL}$ |
|------------|-----------------------------|---------------------------------------------------|-------------------------------------------------------|
| 1          | Hard water                  | 6.00                                              |                                                       |
|            | 0.025                       | 4.00                                              | 2.00                                                  |
|            | 0.05                        | 4.33                                              | 1.67                                                  |
|            | 0.075                       | 3.67                                              | 2.33                                                  |
|            | 0.1                         | $\leq 2.17$                                       | $\geq 3.83$                                           |
|            | 0.25                        | $\leq 1.50$                                       | $\geq 4.50$                                           |
| 2          | Hard water                  | 6.00                                              |                                                       |
|            | 0.025                       | 4.83                                              | 1.17                                                  |
|            | 0.05                        | 4.67                                              | 1.33                                                  |
|            | 0.075                       | 4.17                                              | 1.83                                                  |
|            | 0.1                         | 2.67                                              | 3.33                                                  |
|            | 0.25                        | $\leq 1.50$                                       | $\geq 4.50$                                           |
| 3          | Hard water                  | 6.17                                              |                                                       |
|            | 0.025                       | 4.67                                              | 1.50                                                  |
|            | 0.05                        | 3.83                                              | 2.33                                                  |
|            | 0.075                       | $\leq 2.67$                                       | $\geq 3.50$                                           |
|            | 0.1                         | 3.67                                              | 2.50                                                  |
|            | 0.25                        | $\leq 1.50$                                       | $\geq 4.67$                                           |

**Table S18.** NDV on poplar wood with formic acid at 10 °C and 60 min exposure time.

| Experiment | Concentration in %<br>(v/v) | Titre in<br>$\log_{10}\text{TCID}_{50}/\text{mL}$ | Reduction in<br>$\log_{10}\text{TCID}_{50}/\text{mL}$ |
|------------|-----------------------------|---------------------------------------------------|-------------------------------------------------------|
| 1          | Hard water                  | 6.83                                              |                                                       |
|            | 0.75                        | $\leq 3.00$                                       | $\geq 3.83$                                           |
|            | 1                           | $\leq 2.83$                                       | $\geq 4.00$                                           |
|            | 1.5                         | $\leq 2.50$                                       | $\geq 4.33$                                           |
|            | 2                           | $\leq 2.50$                                       | $\geq 4.33$                                           |
|            | 2.5                         | $\leq 2.50$                                       | $\geq 4.33$                                           |
| 2          | Hard water                  | 6.67                                              |                                                       |
|            | 0.25                        | 4.67                                              | 2.00                                                  |
|            | 0.5                         | 3.83                                              | 2.83                                                  |
|            | 0.75                        | $\leq 3.17$                                       | $\geq 3.50$                                           |
|            | 1                           | $\leq 2.50$                                       | $\geq 4.17$                                           |
|            | 1.5                         | $\leq 2.50$                                       | $\geq 4.17$                                           |
| 3          | Hard water                  | 7.17                                              |                                                       |
|            | 0.25                        | 4.17                                              | 3.00                                                  |
|            | 0.5                         | 4.00                                              | 3.17                                                  |
|            | 0.75                        | 3.67                                              | 3.50                                                  |
|            | 1                           | $\leq 3.17$                                       | $\geq 4.00$                                           |
|            | 1.5                         | $\leq 2.50$                                       | $\geq 4.67$                                           |

**Table S19.** NDV on beech wood with formic acid at 10 °C and 60 min exposure time.

| Experiment | Concentration in %<br>(v/v) | Titre in<br>$\log_{10}\text{TCID}_{50}/\text{mL}$ | Reduction in<br>$\log_{10}\text{TCID}_{50}/\text{mL}$ |
|------------|-----------------------------|---------------------------------------------------|-------------------------------------------------------|
| 1          | Hard water                  | 7.50                                              |                                                       |
|            | 0.25                        | 5.00                                              | 2.50                                                  |
|            | 0.5                         | 4.67                                              | 2.83                                                  |
|            | 0.75                        | 3.83                                              | 3.67                                                  |
|            | 1                           | 4.17                                              | 3.33                                                  |
|            | 1.5                         | 3.50                                              | 4.00                                                  |
| 2          | Hard water                  | 7.50                                              |                                                       |
|            | 0.5                         | 4.83                                              | 2.67                                                  |
|            | 0.75                        | 4.83                                              | 2.67                                                  |
|            | 1                           | 3.67                                              | 3.83                                                  |
|            | 1.5                         | $\leq 3.33$                                       | $\geq 4.17$                                           |
|            | 2                           | $\leq 2.50$                                       | $\geq 5.00$                                           |
| 3          | Hard water                  | 7.33                                              |                                                       |
|            | 0.5                         | 4.83                                              | 2.50                                                  |
|            | 0.75                        | 4.17                                              | 3.17                                                  |
|            | 1                           | 3.67                                              | 3.67                                                  |
|            | 1.5                         | 4.00                                              | 3.33                                                  |
|            | 2                           | $\leq 2.50$                                       | $\geq 4.83$                                           |

**Table S20.** NDV on Douglas fir wood with formic acid at 10 °C and 60 min exposure time.

| Experiment | Concentration in %<br>(v/v) | Titre in<br>$\log_{10}\text{TCID}_{50}/\text{mL}$ | Reduction in<br>$\log_{10}\text{TCID}_{50}/\text{mL}$ |
|------------|-----------------------------|---------------------------------------------------|-------------------------------------------------------|
| 1          | Hard water                  | 7.00                                              |                                                       |
|            | 0.05                        | 5.50                                              | 1.50                                                  |
|            | 0.075                       | 5.33                                              | 1.67                                                  |
|            | 0.1                         | 4.83                                              | 2.17                                                  |
|            | 0.25                        | $\leq 3.00$                                       | $\geq 4.00$                                           |
|            | 0.5                         | $\leq 2.67$                                       | $\geq 4.33$                                           |
| 2          | Hard water                  | 7.50                                              |                                                       |
|            | 0.075                       | 6.67                                              | 0.83                                                  |
|            | 0.1                         | 4.83                                              | 2.67                                                  |
|            | 0.25                        | 4.17                                              | 3.33                                                  |
|            | 0.5                         | 4.83                                              | 2.67                                                  |
|            | 0.75                        | $\leq 2.50$                                       | $\geq 5.00$                                           |
| 3          | Hard water                  | 7.33                                              |                                                       |
|            | 0.075                       | 6.67                                              | 0.67                                                  |
|            | 0.1                         | 6.33                                              | 1.00                                                  |
|            | 0.25                        | 4.83                                              | 2.50                                                  |
|            | 0.5                         | $\leq 2.67$                                       | $\geq 4.67$                                           |
|            | 0.75                        | $\leq 2.50$                                       | $\geq 4.83$                                           |

**Table S21.** EV-E on spruce wood with glutaraldehyde at 10 °C and 60 min exposure time.

| Experiment | Concentration in %<br>(v/v) | Titre in<br>$\log_{10}\text{TCID}_{50}/\text{mL}$ | Reduction in<br>$\log_{10}\text{TCID}_{50}/\text{mL}$ |
|------------|-----------------------------|---------------------------------------------------|-------------------------------------------------------|
| 1          | Hard water                  | 7.50                                              |                                                       |
|            | 1                           | 5.67                                              | 1.83                                                  |
|            | 2.5                         | 6.00                                              | 1.50                                                  |
|            | 5                           | $\leq 5.00$                                       | $\geq 2.50$                                           |
|            | 7.5                         | $\leq 5.00$                                       | $\geq 2.50$                                           |
|            | 10                          | $\leq 5.17$                                       | $\geq 2.33$                                           |
| 2          | Hard water                  | 7.50                                              |                                                       |
|            | 1                           | 6.17                                              | 1.33                                                  |
|            | 2.5                         | $\leq 5.33$                                       | $\geq 2.17$                                           |
|            | 5                           | $\leq 4.83$                                       | $\geq 2.67$                                           |
|            | 7.5                         | $\leq 4.67$                                       | $\geq 2.83$                                           |
|            | 10                          | $\leq 4.67$                                       | $\geq 2.83$                                           |
| 3          | Hard water                  | 8.00                                              |                                                       |
|            | 1                           | 6.00                                              | 2.00                                                  |
|            | 2.5                         | $\leq 5.00$                                       | $\geq 3.00$                                           |
|            | 5                           | $\leq 4.67$                                       | $\geq 3.33$                                           |
|            | 7.5                         | $\leq 4.83$                                       | $\geq 3.17$                                           |
|            | 10                          | $\leq 4.50$                                       | $\geq 3.50$                                           |

**Table S22.** EV-E on pine wood with glutaraldehyde at 10 °C and 60 min exposure time.

| Experiment | Concentration in %<br>(v/v) | Titre in<br>$\log_{10}\text{TCID}_{50}/\text{mL}$ | Reduction in<br>$\log_{10}\text{TCID}_{50}/\text{mL}$ |
|------------|-----------------------------|---------------------------------------------------|-------------------------------------------------------|
| 1          | Hard water                  | 7.33                                              |                                                       |
|            | 1                           | 6.67                                              | 0.67                                                  |
|            | 2.5                         | $\leq 5.50$                                       | $\geq 1.83$                                           |
|            | 5                           | $\leq 4.67$                                       | $\geq 2.67$                                           |
|            | 7.5                         | $\leq 4.83$                                       | $\geq 2.50$                                           |
|            | 10                          | $\leq 4.50$                                       | $\geq 2.83$                                           |
| 2          | Hard water                  | 7.67                                              |                                                       |
|            | 1                           | 6.17                                              | 1.50                                                  |
|            | 2.5                         | $\leq 5.67$                                       | $\geq 2.00$                                           |
|            | 5                           | $\leq 5.00$                                       | $\geq 2.67$                                           |
|            | 7.5                         | $\leq 5.17$                                       | $\geq 2.50$                                           |
|            | 10                          | $\leq 4.50$                                       | $\geq 3.17$                                           |
| 3          | Hard water                  | 7.33                                              |                                                       |
|            | 1                           | 6.50                                              | 0.83                                                  |
|            | 2.5                         | 5.50                                              | 1.83                                                  |
|            | 5                           | $\leq 5.17$                                       | $\geq 2.17$                                           |
|            | 7.5                         | $\leq 5.00$                                       | $\geq 2.33$                                           |
|            | 10                          | $\leq 5.33$                                       | $\geq 2.00$                                           |

**Table S23.** EV-E on poplar wood with glutaraldehyde at 10 °C and 60 min exposure time.

| Experiment | Concentration in %<br>(v/v) | Titre in<br>$\log_{10}\text{TCID}_{50}/\text{mL}$ | Reduction in<br>$\log_{10}\text{TCID}_{50}/\text{mL}$ |
|------------|-----------------------------|---------------------------------------------------|-------------------------------------------------------|
| 1          | Hard water                  | 7.00                                              |                                                       |
|            | 1                           | 6.50                                              | 0.50                                                  |
|            | 2.5                         | 5.67                                              | 1.33                                                  |
|            | 5                           | 5.50                                              | 1.50                                                  |
|            | 7.5                         | $\leq 4.50$                                       | $\geq 2.50$                                           |
|            | 10                          | $\leq 5.33$                                       | $\geq 1.67$                                           |
| 2          | Hard water                  | 7.50                                              |                                                       |
|            | 1                           | 6.50                                              | 1.00                                                  |
|            | 2.5                         | 6.00                                              | 1.50                                                  |
|            | 5                           | $\leq 4.50$                                       | $\geq 3.00$                                           |
|            | 7.5                         | $\leq 5.17$                                       | $\geq 2.33$                                           |
|            | 10                          | $\leq 5.00$                                       | $\geq 2.50$                                           |
| 3          | Hard water                  | 7.33                                              |                                                       |
|            | 1                           | 6.50                                              | 0.83                                                  |
|            | 2.5                         | 6.00                                              | 1.33                                                  |
|            | 5                           | $\leq 4.50$                                       | $\geq 2.83$                                           |
|            | 7.5                         | 5.50                                              | 1.83                                                  |
|            | 10                          | $\leq 5.50$                                       | $\geq 1.83$                                           |

**Table S24.** EV-E on beech wood with glutaraldehyde at 10 °C and 60 min exposure time.

| Experiment | Concentration in %<br>(v/v) | Titre in<br>$\log_{10}\text{TCID}_{50}/\text{mL}$ | Reduction in<br>$\log_{10}\text{TCID}_{50}/\text{mL}$ |
|------------|-----------------------------|---------------------------------------------------|-------------------------------------------------------|
| 1          | Hard water                  | 8.17                                              |                                                       |
|            | 1                           | 6.50                                              | 1.67                                                  |
|            | 2.5                         | 5.83                                              | 2.33                                                  |
|            | 5                           | 5.67                                              | 2.50                                                  |
|            | 7.5                         | 5.67                                              | 2.50                                                  |
|            | 10                          | $\leq 5.33$                                       | $\geq 2.83$                                           |
| 2          | Hard water                  | 8.00                                              |                                                       |
|            | 1                           | 6.00                                              | 2.00                                                  |
|            | 2.5                         | 5.50                                              | 2.50                                                  |
|            | 5                           | $\leq 5.33$                                       | $\geq 2.67$                                           |
|            | 7.5                         | $\leq 4.83$                                       | $\geq 3.17$                                           |
|            | 10                          | $\leq 5.17$                                       | $\geq 2.83$                                           |
| 3          | Hard water                  | 7.67                                              |                                                       |
|            | 1                           | 6.50                                              | 1.17                                                  |
|            | 2.5                         | 6.17                                              | 1.50                                                  |
|            | 5                           | $\leq 5.00$                                       | $\geq 2.67$                                           |
|            | 7.5                         | $\leq 5.17$                                       | $\geq 2.50$                                           |
|            | 10                          | $\leq 4.83$                                       | $\geq 2.83$                                           |

**Table S25.** EV-E on Douglas fir wood with glutaraldehyde at 10 °C and 60 min exposure time.

| Experiment | Concentration in %<br>(v/v) | Titre in<br>$\log_{10}\text{TCID}_{50}/\text{mL}$ | Reduction in<br>$\log_{10}\text{TCID}_{50}/\text{mL}$ |
|------------|-----------------------------|---------------------------------------------------|-------------------------------------------------------|
| 1          | Hard water                  | 6.50                                              |                                                       |
|            | 1                           | $\leq 5.33$                                       | $\geq 1.17$                                           |
|            | 2.5                         | $\leq 5.17$                                       | $\geq 1.33$                                           |
|            | 5                           | $\leq 4.83$                                       | $\geq 1.67$                                           |
|            | 7.5                         | $\leq 4.67$                                       | $\geq 1.83$                                           |
|            | 10                          | $\leq 4.50$                                       | $\geq 2.00$                                           |
| 2          | Hard water                  | 7.17                                              |                                                       |
|            | 1                           | $\leq 5.33$                                       | $\geq 1.83$                                           |
|            | 2.5                         | $\leq 5.17$                                       | $\geq 2.00$                                           |
|            | 5                           | $\leq 5.00$                                       | $\geq 2.17$                                           |
|            | 7.5                         | $\leq 4.50$                                       | $\geq 2.67$                                           |
|            | 10                          | $\leq 4.67$                                       | $\geq 2.50$                                           |
| 3          | Hard water                  | 7.33                                              |                                                       |
|            | 1                           | 6.17                                              | 1.17                                                  |
|            | 2.5                         | 5.67                                              | 1.67                                                  |
|            | 5                           | $\leq 4.50$                                       | $\geq 2.83$                                           |
|            | 7.5                         | $\leq 5.33$                                       | $\geq 2.00$                                           |
|            | 10                          | $\leq 4.67$                                       | $\geq 2.67$                                           |

**Table S26.** NDV on spruce wood with glutaraldehyde at 10 °C and 60 min exposure time.

| Experiment | Concentration in %<br>(v/v) | Titre in<br>$\log_{10}\text{TCID}_{50}/\text{mL}$ | Reduction in<br>$\log_{10}\text{TCID}_{50}/\text{mL}$ |
|------------|-----------------------------|---------------------------------------------------|-------------------------------------------------------|
| 1          | Hard water                  | 6.50                                              |                                                       |
|            | 0.25                        | $\leq 3.00$                                       | $\geq 3.50$                                           |
|            | 0.5                         | $\leq 2.83$                                       | $\geq 3.67$                                           |
|            | 0.75                        | $\leq 2.50$                                       | $\geq 4.00$                                           |
|            | 1                           | $\leq 2.50$                                       | $\geq 4.00$                                           |
|            | 1.5                         | $\leq 2.50$                                       | $\geq 4.00$                                           |
| 2          | Hard water                  | 6.50                                              |                                                       |
|            | 0.1                         | 3.67                                              | 2.83                                                  |
|            | 0.25                        | $\leq 3.17$                                       | $\geq 3.33$                                           |
|            | 0.5                         | $\leq 2.50$                                       | $\geq 4.00$                                           |
|            | 0.75                        | $\leq 2.50$                                       | $\geq 4.00$                                           |
|            | 1                           | $\leq 2.50$                                       | $\geq 4.00$                                           |
| 3          | Hard water                  | 6.50                                              |                                                       |
|            | 0.1                         | 3.50                                              | 3.00                                                  |
|            | 0.25                        | $\leq 3.17$                                       | $\geq 3.33$                                           |
|            | 0.5                         | $\leq 2.67$                                       | $\geq 3.83$                                           |
|            | 0.75                        | $\leq 2.50$                                       | $\geq 4.00$                                           |
|            | 1                           | $\leq 2.50$                                       | $\geq 4.00$                                           |

**Table S27.** NDV on pine wood with glutaraldehyde at 10 °C and 60 min exposure time.

| Experiment | Concentration in %<br>(v/v) | Titre in<br>$\log_{10}\text{TCID}_{50}/\text{mL}$ | Reduction in<br>$\log_{10}\text{TCID}_{50}/\text{mL}$ |
|------------|-----------------------------|---------------------------------------------------|-------------------------------------------------------|
| 1          | Hard water                  | 6.83                                              |                                                       |
|            | 0.075                       | 3.33                                              | 3.50                                                  |
|            | 0.1                         | $\leq 1.50$                                       | $\geq 5.33$                                           |
|            | 0.25                        | $\leq 1.50$                                       | $\geq 5.33$                                           |
|            | 0.5                         | $\leq 1.50$                                       | $\geq 5.33$                                           |
|            | 0.75                        | $\leq 1.50$                                       | $\geq 5.33$                                           |
| 2          | Hard water                  | 5.67                                              |                                                       |
|            | 0.025                       | 3.33                                              | 2.33                                                  |
|            | 0.05                        | 2.67                                              | 3.00                                                  |
|            | 0.075                       | $\leq 1.67$                                       | $\geq 4.00$                                           |
|            | 0.1                         | $\leq 1.50$                                       | $\geq 4.17$                                           |
|            | 0.25                        | $\leq 1.50$                                       | $\geq 4.17$                                           |
| 3          | Hard water                  | 6.17                                              |                                                       |
|            | 0.025                       | 3.50                                              | 2.67                                                  |
|            | 0.05                        | 2.50                                              | 3.67                                                  |
|            | 0.075                       | $\leq 2.17$                                       | $\geq 4.00$                                           |
|            | 0.1                         | $\leq 1.50$                                       | $\geq 4.67$                                           |
|            | 0.25                        | $\leq 1.50$                                       | $\geq 4.67$                                           |

**Table S28.** NDV on poplar wood with glutaraldehyde at 10 °C and 60 min exposure time.

| Experiment | Concentration in %<br>(v/v) | Titre in<br>$\log_{10}\text{TCID}_{50}/\text{mL}$ | Reduction in<br>$\log_{10}\text{TCID}_{50}/\text{mL}$ |
|------------|-----------------------------|---------------------------------------------------|-------------------------------------------------------|
| 1          | Hard water                  | 6.83                                              |                                                       |
|            | 0.25                        | 3.67                                              | 3.17                                                  |
|            | 0.5                         | $\leq 3.17$                                       | $\geq 3.67$                                           |
|            | 0.75                        | 4.17                                              | 2.67                                                  |
|            | 1                           | $\leq 3.33$                                       | $\geq 3.50$                                           |
|            | 1.5                         | $\leq 2.67$                                       | $\geq 4.17$                                           |
| 2          | Hard water                  | 6.83                                              |                                                       |
|            | 1                           | $\leq 3.00$                                       | $\geq 3.83$                                           |
|            | 1.5                         | $\leq 2.50$                                       | $\geq 4.33$                                           |
|            | 2                           | $\leq 2.50$                                       | $\geq 4.33$                                           |
|            | 2.5                         | $\leq 2.50$                                       | $\geq 4.33$                                           |
|            | 3                           | $\leq 2.50$                                       | $\geq 4.33$                                           |
| 3          | Hard water                  | 6.67                                              |                                                       |
|            | 1                           | $\leq 2.83$                                       | $\geq 3.83$                                           |
|            | 1.5                         | $\leq 2.50$                                       | $\geq 4.17$                                           |
|            | 2                           | $\leq 2.50$                                       | $\geq 4.17$                                           |
|            | 2.5                         | $\leq 2.50$                                       | $\geq 4.17$                                           |
|            | 3                           | $\leq 2.50$                                       | $\geq 4.17$                                           |

**Table S29.** NDV on beech wood with glutaraldehyde at 10 °C and 60 min exposure time.

| Experiment | Concentration in %<br>(v/v) | Titre in<br>$\log_{10}\text{TCID}_{50}/\text{mL}$ | Reduction in<br>$\log_{10}\text{TCID}_{50}/\text{mL}$ |
|------------|-----------------------------|---------------------------------------------------|-------------------------------------------------------|
| 1          | Hard water                  | 7.50                                              |                                                       |
|            | 0.75                        | 3.67                                              | 3.83                                                  |
|            | 1                           | 3.83                                              | 3.67                                                  |
|            | 1.5                         | $\leq 2.50$                                       | $\geq 5.00$                                           |
|            | 2                           | $\leq 2.50$                                       | $\geq 5.00$                                           |
|            | 2.5                         | $\leq 2.50$                                       | $\geq 5.00$                                           |
| 2          | Hard water                  | 7.50                                              |                                                       |
|            | 0.5                         | 3.83                                              | 3.67                                                  |
|            | 0.75                        | 3.67                                              | 3.83                                                  |
|            | 1                           | 4.00                                              | 3.50                                                  |
|            | 1.5                         | $\leq 2.67$                                       | $\geq 4.83$                                           |
|            | 2                           | $\leq 2.50$                                       | $\geq 5.00$                                           |
| 3          | Hard water                  | 7.33                                              |                                                       |
|            | 0.5                         | 4.50                                              | 2.83                                                  |
|            | 0.75                        | $\leq 3.50$                                       | $\geq 3.83$                                           |
|            | 1                           | $\leq 2.67$                                       | $\geq 4.67$                                           |
|            | 1.5                         | $\leq 2.50$                                       | $\geq 4.83$                                           |
|            | 2                           | $\leq 2.50$                                       | $\geq 4.83$                                           |

**Table S30.** NDV on Douglas fir wood with glutaraldehyde at 10 °C and 60 min exposure time.

| Experiment | Concentration in %<br>(v/v) | Titre in<br>$\log_{10}\text{TCID}_{50}/\text{mL}$ | Reduction in<br>$\log_{10}\text{TCID}_{50}/\text{mL}$ |
|------------|-----------------------------|---------------------------------------------------|-------------------------------------------------------|
| 1          | Hard water                  | 7.83                                              |                                                       |
|            | 0.25                        | 4.00                                              | 3.83                                                  |
|            | 0.5                         | $\leq 3.17$                                       | $\geq 4.67$                                           |
|            | 0.75                        | $\leq 2.50$                                       | $\geq 5.33$                                           |
|            | 1                           | $\leq 3.33$                                       | $\geq 4.50$                                           |
|            | 1.5                         | $\leq 2.50$                                       | $\geq 5.33$                                           |
| 2          | Hard water                  | 7.67                                              |                                                       |
|            | 0.075                       | 5.00                                              | 2.67                                                  |
|            | 0.1                         | 4.67                                              | 3.00                                                  |
|            | 0.25                        | 5.33                                              | 2.33                                                  |
|            | 0.5                         | $\leq 2.67$                                       | $\geq 5.00$                                           |
|            | 0.75                        | $\leq 2.50$                                       | $\geq 5.17$                                           |
| 3          | Hard water                  | 7.50                                              |                                                       |
|            | 0.075                       | 4.83                                              | 2.67                                                  |
|            | 0.1                         | 4.83                                              | 2.67                                                  |
|            | 0.25                        | 4.17                                              | 3.33                                                  |
|            | 0.5                         | $\leq 3.83$                                       | $\geq 3.67$                                           |
|            | 0.75                        | $\leq 2.67$                                       | $\geq 4.83$                                           |

**Table S31.** EV-E on spruce wood with peracetic acid at -10 °C and 60 min exposure time.

| Experiment | Concentration in %<br>(v/v) | Titre in<br>$\log_{10}\text{TCID}_{50}/\text{mL}$ | Reduction in<br>$\log_{10}\text{TCID}_{50}/\text{mL}$ |
|------------|-----------------------------|---------------------------------------------------|-------------------------------------------------------|
| 1          | Hard water                  | 8.33                                              |                                                       |
|            | 0.1                         | 5.33                                              | 3.00                                                  |
|            | 0.25                        | $\leq 3.50$                                       | $\geq 4.83$                                           |
|            | 0.5                         | $\leq 2.83$                                       | $\geq 5.50$                                           |
|            | 0.75                        | $\leq 2.50$                                       | $\geq 5.83$                                           |
|            | 1                           | $\leq 2.50$                                       | $\geq 5.83$                                           |
| 2          | Hard water                  | 8.00                                              |                                                       |
|            | 0.05                        | 5.83                                              | 2.17                                                  |
|            | 0.075                       | 4.83                                              | 3.17                                                  |
|            | 0.1                         | 5.00                                              | 3.00                                                  |
|            | 0.25                        | $\leq 3.17$                                       | $\geq 4.83$                                           |
|            | 0.5                         | $\leq 2.67$                                       | $\geq 5.33$                                           |
| 3          | Hard water                  | 8.17                                              |                                                       |
|            | 0.05                        | 5.67                                              | 2.50                                                  |
|            | 0.075                       | 5.33                                              | 2.83                                                  |
|            | 0.1                         | 5.17                                              | 3.00                                                  |
|            | 0.25                        | $\leq 2.83$                                       | $\geq 5.33$                                           |
|            | 0.5                         | $\leq 2.50$                                       | $\geq 5.67$                                           |

**Table S32.** EV-E on pine wood with peracetic acid at -10 °C and 60 min exposure time.

| Experiment | Concentration in %<br>(v/v) | Titre in<br>$\log_{10}\text{TCID}_{50}/\text{mL}$ | Reduction in<br>$\log_{10}\text{TCID}_{50}/\text{mL}$ |
|------------|-----------------------------|---------------------------------------------------|-------------------------------------------------------|
| 1          | Hard water                  | 7.67                                              |                                                       |
|            | 0.05                        | 5.50                                              | 2.17                                                  |
|            | 0.075                       | 5.17                                              | 2.50                                                  |
|            | 0.1                         | 5.17                                              | 2.50                                                  |
|            | 0.25                        | 4.50                                              | 3.17                                                  |
|            | 0.5                         | $\leq 2.67$                                       | $\geq 5.00$                                           |
| 2          | Hard water                  | 8.17                                              |                                                       |
|            | 0.05                        | 5.83                                              | 2.33                                                  |
|            | 0.075                       | 5.17                                              | 3.00                                                  |
|            | 0.1                         | 6.00                                              | 2.17                                                  |
|            | 0.25                        | 4.83                                              | 3.33                                                  |
|            | 0.5                         | $\leq 4.00$                                       | $\geq 4.17$                                           |
| 3          | Hard water                  | 7.67                                              |                                                       |
|            | 0.075                       | 5.67                                              | 2.00                                                  |
|            | 0.1                         | 5.67                                              | 2.00                                                  |
|            | 0.25                        | 4.33                                              | 3.33                                                  |
|            | 0.5                         | 3.50                                              | 4.17                                                  |
|            | 0.75                        | $\leq 3.50$                                       | $\geq 4.17$                                           |



**Table S33.** EV-E on poplar wood with peracetic acid at -10 °C and 60 min exposure time.

| Experiment | Concentration in %<br>(v/v) | Titre in<br>$\log_{10}\text{TCID}_{50}/\text{mL}$ | Reduction in<br>$\log_{10}\text{TCID}_{50}/\text{mL}$ |
|------------|-----------------------------|---------------------------------------------------|-------------------------------------------------------|
| 1          | Hard water                  | 7.83                                              |                                                       |
|            | 0.05                        | 5.17                                              | 2.67                                                  |
|            | 0.075                       | 5.33                                              | 2.50                                                  |
|            | 0.1                         | 4.17                                              | 3.67                                                  |
|            | 0.25                        | $\leq 2.83$                                       | $\geq 5.00$                                           |
|            | 0.5                         | $\leq 3.17$                                       | $\geq 4.67$                                           |
| 2          | Hard water                  | 8.17                                              |                                                       |
|            | 0.05                        | 5.17                                              | 3.00                                                  |
|            | 0.075                       | 4.50                                              | 3.67                                                  |
|            | 0.1                         | 5.67                                              | 2.50                                                  |
|            | 0.25                        | $\leq 3.33$                                       | $\geq 4.83$                                           |
|            | 0.5                         | $\leq 2.50$                                       | $\geq 5.67$                                           |
| 3          | Hard water                  | 7.50                                              |                                                       |
|            | 0.05                        | 5.17                                              | 2.33                                                  |
|            | 0.075                       | 4.50                                              | 3.00                                                  |
|            | 0.1                         | 4.00                                              | 3.50                                                  |
|            | 0.25                        | $\leq 2.67$                                       | $\geq 4.83$                                           |
|            | 0.5                         | $\leq 2.50$                                       | $\geq 5.00$                                           |

**Table S34.** EV-E on beech wood with peracetic acid at -10 °C and 60 min exposure time.

| Experiment | Concentration in %<br>(v/v) | Titre in<br>$\log_{10}\text{TCID}_{50}/\text{mL}$ | Reduction in<br>$\log_{10}\text{TCID}_{50}/\text{mL}$ |
|------------|-----------------------------|---------------------------------------------------|-------------------------------------------------------|
| 1          | Hard water                  | 7.83                                              |                                                       |
|            | 0.075                       | 5.33                                              | 2.50                                                  |
|            | 0.1                         | 5.33                                              | 2.50                                                  |
|            | 0.25                        | 4.00                                              | 3.83                                                  |
|            | 0.5                         | $\leq 3.17$                                       | $\geq 4.67$                                           |
|            | 0.75                        | $\leq 2.50$                                       | $\geq 5.33$                                           |
| 2          | Hard water                  | 7.83                                              |                                                       |
|            | 0.075                       | 5.67                                              | 2.17                                                  |
|            | 0.1                         | 5.33                                              | 2.50                                                  |
|            | 0.25                        | 4.17                                              | 3.67                                                  |
|            | 0.5                         | 4.67                                              | 3.17                                                  |
|            | 0.75                        | $\leq 2.50$                                       | $\geq 5.33$                                           |
| 3          | Hard water                  | 7.83                                              |                                                       |
|            | 0.075                       | 5.17                                              | 2.67                                                  |
|            | 0.1                         | 5.17                                              | 2.67                                                  |
|            | 0.25                        | 4.00                                              | 3.83                                                  |
|            | 0.5                         | $\leq 2.67$                                       | $\geq 5.17$                                           |
|            | 0.75                        | $\leq 2.50$                                       | $\geq 5.33$                                           |

**Table S35.** EV-E on Douglas fir wood with peracetic acid at -10 °C and 60 min exposure time.

| Experiment | Concentration in %<br>(v/v) | Titre in<br>$\log_{10}\text{TCID}_{50}/\text{mL}$ | Reduction in<br>$\log_{10}\text{TCID}_{50}/\text{mL}$ |
|------------|-----------------------------|---------------------------------------------------|-------------------------------------------------------|
| 1          | Hard water                  | 7.67                                              |                                                       |
|            | 0.075                       | 5.83                                              | 1.83                                                  |
|            | 0.1                         | 4.67                                              | 3.00                                                  |
|            | 0.25                        | 4.50                                              | 3.17                                                  |
|            | 0.5                         | $\leq 2.50$                                       | $\geq 5.17$                                           |
|            | 0.75                        | $\leq 2.50$                                       | $\geq 5.17$                                           |
| 2          | Hard water                  | 7.83                                              |                                                       |
|            | 0.075                       | 6.50                                              | 1.33                                                  |
|            | 0.1                         | 5.50                                              | 2.33                                                  |
|            | 0.25                        | 5.50                                              | 2.33                                                  |
|            | 0.5                         | $\leq 3.33$                                       | $\geq 4.50$                                           |
|            | 0.75                        | $\leq 3.50$                                       | $\geq 4.33$                                           |
| 3          | Hard water                  | 7.17                                              |                                                       |
|            | 0.075                       | 5.67                                              | 1.50                                                  |
|            | 0.1                         | 5.50                                              | 1.67                                                  |
|            | 0.25                        | 4.00                                              | 3.17                                                  |
|            | 0.5                         | $\leq 2.50$                                       | $\geq 4.67$                                           |
|            | 0.75                        | $\leq 2.67$                                       | $\geq 4.50$                                           |

**Table S36.** EV-E on spruce wood with formic acid at -10 °C and 60 min exposure time.

| Experiment | Concentration in %<br>(v/v) | Titre in<br>$\log_{10}\text{TCID}_{50}/\text{mL}$ | Reduction in<br>$\log_{10}\text{TCID}_{50}/\text{mL}$ |
|------------|-----------------------------|---------------------------------------------------|-------------------------------------------------------|
| 1          | Hard water                  | 7.00                                              |                                                       |
|            | 1                           | 5.83                                              | 1.17                                                  |
|            | 1.5                         | 4.67                                              | 2.33                                                  |
|            | 2                           | $\leq 3.33$                                       | $\geq 3.67$                                           |
|            | 2.5                         | 3.83                                              | 3.17                                                  |
|            | 3                           | $\leq 2.50$                                       | $\geq 4.50$                                           |
| 2          | Hard water                  | 7.67                                              |                                                       |
|            | 1.5                         | 5.17                                              | 2.50                                                  |
|            | 2                           | 4.17                                              | 3.50                                                  |
|            | 2.5                         | 4.17                                              | 3.50                                                  |
|            | 3                           | $\leq 2.67$                                       | $\geq 5.00$                                           |
|            | 3.5                         | $\leq 2.50$                                       | $\geq 5.17$                                           |
| 3          | Hard water                  | 7.50                                              |                                                       |
|            | 1.5                         | 3.83                                              | 3.67                                                  |
|            | 2                           | 4.00                                              | 3.50                                                  |
|            | 2.5                         | $\leq 2.67$                                       | $\geq 4.83$                                           |
|            | 3                           | $\leq 2.50$                                       | $\geq 5.00$                                           |
|            | 3.5                         | $\leq 2.50$                                       | $\geq 5.00$                                           |

**Table S37.** EV-E on pine wood with formic acid at -10 °C and 60 min exposure time.

| Experiment | Concentration in %<br>(v/v) | Titre in<br>$\log_{10}\text{TCID}_{50}/\text{mL}$ | Reduction in<br>$\log_{10}\text{TCID}_{50}/\text{mL}$ |
|------------|-----------------------------|---------------------------------------------------|-------------------------------------------------------|
| 1          | Hard water                  | 7.50                                              |                                                       |
|            | 2                           | 5.00                                              | 2.50                                                  |
|            | 3                           | 3.83                                              | 3.67                                                  |
|            | 4                           | 3.83                                              | 3.67                                                  |
|            | 5                           | $\leq 2.50$                                       | $\geq 5.00$                                           |
|            | 6                           | $\leq 2.50$                                       | $\geq 5.00$                                           |
| 2          | Hard water                  | 7.67                                              |                                                       |
|            | 2                           | 5.67                                              | 2.00                                                  |
|            | 3                           | 4.83                                              | 2.83                                                  |
|            | 4                           | 4.17                                              | 3.50                                                  |
|            | 5                           | $\leq 2.50$                                       | $\geq 5.17$                                           |
|            | 6                           | $\leq 3.67$                                       | $\geq 4.00$                                           |
| 3          | Hard water                  | 7.50                                              |                                                       |
|            | 2                           | 5.00                                              | 2.50                                                  |
|            | 3                           | 4.00                                              | 3.50                                                  |
|            | 4                           | 4.17                                              | 3.33                                                  |
|            | 5                           | $\leq 3.17$                                       | $\geq 4.33$                                           |
|            | 6                           | $\leq 2.50$                                       | $\geq 5.00$                                           |

**Table S38.** EV-E on poplar wood with formic acid at -10 °C and 60 min exposure time.

| Experiment | Concentration in %<br>(v/v) | Titre in<br>$\log_{10}\text{TCID}_{50}/\text{mL}$ | Reduction in<br>$\log_{10}\text{TCID}_{50}/\text{mL}$ |
|------------|-----------------------------|---------------------------------------------------|-------------------------------------------------------|
| 1          | Hard water                  | 7.33                                              |                                                       |
|            | 1                           | 5.67                                              | 1.67                                                  |
|            | 1.5                         | 5.00                                              | 2.33                                                  |
|            | 2                           | 4.50                                              | 2.83                                                  |
|            | 2.5                         | $\leq 2.67$                                       | $\geq 4.67$                                           |
|            | 3                           | $\leq 3.17$                                       | $\geq 4.17$                                           |
| 2          | Hard water                  | 7.17                                              |                                                       |
|            | 1.5                         | 5.83                                              | 1.33                                                  |
|            | 2                           | 4.67                                              | 2.50                                                  |
|            | 2.5                         | $\leq 3.33$                                       | $\geq 3.83$                                           |
|            | 3                           | $\leq 2.50$                                       | $\geq 4.67$                                           |
|            | 3.5                         | $\leq 2.50$                                       | $\geq 4.67$                                           |
| 3          | Hard water                  | 7.33                                              |                                                       |
|            | 2                           | 5.00                                              | 2.33                                                  |
|            | 2.5                         | 4.17                                              | 3.17                                                  |
|            | 3                           | $\leq 2.67$                                       | $\geq 4.67$                                           |
|            | 3.5                         | $\leq 2.50$                                       | $\geq 4.83$                                           |
|            | 4                           | $\leq 2.50$                                       | $\geq 4.83$                                           |

**Table S39.** EV-E on beech wood with formic acid at -10 °C and 60 min exposure time.

| Experiment | Concentration in %<br>(v/v) | Titre in<br>$\log_{10}\text{TCID}_{50}/\text{mL}$ | Reduction in<br>$\log_{10}\text{TCID}_{50}/\text{mL}$ |
|------------|-----------------------------|---------------------------------------------------|-------------------------------------------------------|
| 1          | Hard water                  | 8.00                                              |                                                       |
|            | 2                           | 4.83                                              | 3.17                                                  |
|            | 2.5                         | 3.83                                              | 4.17                                                  |
|            | 3                           | $\leq 3.17$                                       | $\geq 4.83$                                           |
|            | 3.5                         | $\leq 2.50$                                       | $\geq 5.50$                                           |
|            | 4                           | $\leq 2.83$                                       | $\geq 5.17$                                           |
| 2          | Hard water                  | 7.50                                              |                                                       |
|            | 1.5                         | 5.00                                              | 2.50                                                  |
|            | 2                           | 4.83                                              | 2.67                                                  |
|            | 2.5                         | 4.17                                              | 3.33                                                  |
|            | 3                           | $\leq 3.33$                                       | $\geq 4.17$                                           |
|            | 3.5                         | $\leq 2.83$                                       | $\geq 4.67$                                           |
| 3          | Hard water                  | 7.67                                              |                                                       |
|            | 1.5                         | 5.33                                              | 2.33                                                  |
|            | 2                           | 4.67                                              | 3.00                                                  |
|            | 2.5                         | $\leq 3.33$                                       | $\geq 4.33$                                           |
|            | 3                           | $\leq 2.50$                                       | $\geq 5.17$                                           |
|            | 3.5                         | $\leq 3.33$                                       | $\geq 4.33$                                           |

**Table S40.** EV-E on Douglas fir wood with formic acid at -10 °C and 60 min exposure time.

| Experiment | Concentration in %<br>(v/v) | Titre in<br>$\log_{10}\text{TCID}_{50}/\text{mL}$ | Reduction in<br>$\log_{10}\text{TCID}_{50}/\text{mL}$ |
|------------|-----------------------------|---------------------------------------------------|-------------------------------------------------------|
| 1          | Hard water                  | 7.17                                              |                                                       |
|            | 2                           | 4.33                                              | 2.83                                                  |
|            | 2.5                         | 3.50                                              | 3.67                                                  |
|            | 3                           | $\leq 3.33$                                       | $\geq 3.83$                                           |
|            | 3.5                         | $\leq 2.50$                                       | $\geq 4.67$                                           |
|            | 4                           | $\leq 2.50$                                       | $\geq 4.67$                                           |
| 2          | Hard water                  | 6.83                                              |                                                       |
|            | 2                           | 4.83                                              | 2.00                                                  |
|            | 2.5                         | 4.00                                              | 2.83                                                  |
|            | 3                           | $\leq 2.50$                                       | $\geq 4.33$                                           |
|            | 3.5                         | $\leq 2.50$                                       | $\geq 4.33$                                           |
|            | 4                           | $\leq 2.50$                                       | $\geq 4.33$                                           |
| 3          | Hard water                  | 7.17                                              |                                                       |
|            | 2                           | 5.50                                              | 1.67                                                  |
|            | 2.5                         | 4.83                                              | 2.33                                                  |
|            | 3                           | $\leq 3.33$                                       | $\geq 3.83$                                           |
|            | 3.5                         | $\leq 3.83$                                       | $\geq 3.33$                                           |
|            | 4                           | $\leq 3.17$                                       | $\geq 4.00$                                           |
